# Supplementary material for: Animal sales from Wuhan wet markets immediately prior to the COVID-19 pandemic
Source: PubMed Central journal article supplement (PMC8184983; doi:10.1038/s41598-021-91470-2), 2021-06-07
Supplement: 41598_2021_91470_MOESM1_ESM.pdf [file 41598_2021_91470_MOESM1_ESM.pdf]

Animal sales from Wuhan wet markets immediately prior to the COVID-19  
pandemic

Xiao Xiao, Chris Newman, Christina D Buesching, David W Macdonald, Zhao-Min Zhou

**Table S1.**

List of 38 species sold in Wuhan City markets from May 2017-Nov 2019, of which thirty-three have been reportedly infected with zoonotic pathogens in wild populations, markets and/or farms in China since 2009. Note: The masked palm civet (*Paguma larvata*) was the host involved in the 2003 SARS outbreak\*.

| Species on sale                                    | Zoonotic pathogens found in wild populations                                                                                                    | Zoonotic pathogens found in markets | Zoonotic pathogens found in farmed hosts                                                                                                                                                                                                                                                                                                  |
|----------------------------------------------------|-------------------------------------------------------------------------------------------------------------------------------------------------|-------------------------------------|-------------------------------------------------------------------------------------------------------------------------------------------------------------------------------------------------------------------------------------------------------------------------------------------------------------------------------------------|
| <b>Mammals</b>                                     |                                                                                                                                                 |                                     |                                                                                                                                                                                                                                                                                                                                           |
| Raccoon dog<br>( <i>Nyctereutes procyonoides</i> ) |                                                                                                                                                 |                                     | <i>Enterocytozoon bieneusi</i> (Yang et al. 2015), H5N1 Influenza (Qi et al. 2009), Arctic-like rabies virus (Shao et al. 2011), <i>Toxoplasma gondii</i> (Zheng et al. 2017), Carnivore amdoparvovirus (Shao et al. 2014), canine distemper virus (Zhao et al. 2010; Cheng et al. 2015), <i>Enterocytozoon bieneusi</i> (Xu et al. 2016) |
| Amur hedgehog<br>( <i>Erinaceus amurensis</i> )    | <i>Coxiella burnetii</i> (Gong et al. 2020), <i>Enterocytozoon bieneusi</i> (Gong et al. 2021), <i>Leptospira interrogans</i> (Ma et al. 2020a) |                                     |                                                                                                                                                                                                                                                                                                                                           |
| Siberian weasel<br>( <i>Mustela sibirica</i> )     |                                                                                                                                                 |                                     |                                                                                                                                                                                                                                                                                                                                           |
| Hog badger<br>( <i>Arctonyx albogularis</i> )      |                                                                                                                                                 |                                     |                                                                                                                                                                                                                                                                                                                                           |
| Asian badger<br>( <i>Meles leucurus</i> )          | <i>Babesia</i> spp. (Sang et al. 2021)                                                                                                          |                                     |                                                                                                                                                                                                                                                                                                                                           |
| Chinese hare<br>( <i>Lepus sinensis</i> )          | <i>Klebsiella pneumoniae</i> (Du et al. 2014)                                                                                                   |                                     |                                                                                                                                                                                                                                                                                                                                           |

Pallas's squirrel  
(*Callosciurus erythraeus*)

Masked palm civet\*  
(*Paguma larvata*)

Chinese bamboo rat  
(*Rhizomys sinensis*)

Malayan porcupine  
(*Hystrix brachyura*)  
Chinese muntjac  
(*Muntiacus reevesi*)  
Coypu  
(*Myocastor coypus*)

Marmot  
(*Marmota himalayana*)

Red fox  
(*Vulpes vulpes*)  
Mink  
(*Neovison vison*)

Red squirrel  
(*Sciurus vulgaris*)

Wild boar  
(*Sus scrofa*)

*Penicillium marneffe* (Cao et al. 2011)

*Yersinia pestis* (Xu et al. 2018),  
*Enterocytozoon bieneusi* (Xu et al. 2020)

*Enterocytozoon bieneusi* (Deng et al. 2016), *Cryptosporidium* spp. (Chai et al. 2019),

*Enterocytozoon bieneusi*, *Giardia duodenalis* and *Cryptosporidium* spp. (Yu et al. 2020), *Toxoplasma gondii* (Hou et al. 2016)

*Enterocytozoon bieneusi* (Wang et al. 2019), *Cryptosporidium* spp. (Wei et al. 2019; Li et al. 2020), *Giardia duodenalis* (Ma et al. 2018)

*Giardia duodenalis* (Cui et al. 2021), *Enterocytozoon bieneusi* (Yu et al. 2020)

*Enterocytozoon bieneusi* (Yang et al. 2015; Ma et al. 2020b), *Enterocytozoon bieneusi* (Zhang et al. 2018), Newcastle disease virus (Zhao et al. 2014), severe pseudorabies virus (Liu et al. 2017), *Circovirus* (Lian et al. 2014)

*Cryptosporidium* spp.,  
*Enterocytozoon bieneusi* (Deng et al. 2020)

*Clostridium perfringens* (Li et al. 2017), *Enterocytozoon bieneusi*

|                                                                     |                                                               |                                                                                                 |                                                                                                                                                               |
|---------------------------------------------------------------------|---------------------------------------------------------------|-------------------------------------------------------------------------------------------------|---------------------------------------------------------------------------------------------------------------------------------------------------------------|
| Complex-toothed Flying Squirrel<br>( <i>Troglodytes xanthipes</i> ) |                                                               |                                                                                                 | and <i>Cryptosporidium</i> spp. (Feng et al. 2020), <i>Toxoplasma gondii</i> (Bai et al. 2017)<br><i>Leptospira</i> , <i>Blastocystis</i> (Xiao et al. 2019a) |
| <b>Birds</b>                                                        |                                                               |                                                                                                 |                                                                                                                                                               |
| Collared crow<br>( <i>Corvus torquatus</i> )                        |                                                               |                                                                                                 |                                                                                                                                                               |
| Spotted dove<br>( <i>Spilopelia chinensis</i> )                     | Newcastle disease virus (Duan et al. 2014; Xiang et al. 2017) |                                                                                                 |                                                                                                                                                               |
| Eurasian magpie<br>( <i>Pica pica</i> )                             |                                                               | <i>Toxoplasma gondii</i> (Chen et al. 2015)                                                     |                                                                                                                                                               |
| Crested myna<br>( <i>Acridotheres cristatellus</i> )                |                                                               | <i>Enterocytozoon bieneusi</i> (Deng et al. 2019), <i>Cryptosporidium</i> spp. (Li et al. 2016) |                                                                                                                                                               |
| Chukar partridge<br>( <i>Alectoris chukar</i> )                     |                                                               |                                                                                                 | Duck Influenza Virus Subtype H9N2 (Zhu et al. 2018)                                                                                                           |
| Ring-necked Pheasant<br>( <i>Phasianus colchicus</i> )              |                                                               |                                                                                                 | Avian coronaviruses (Han et al. 2020)                                                                                                                         |
| Peacock<br>( <i>Pavo cristatus</i> )                                |                                                               |                                                                                                 | H5N6 avian influenza virus (Li et al. 2019), <i>Cryptosporidium</i> spp., <i>Enterocytozoon bieneusi</i> (Feng et al. 2016)                                   |
| Guinea fowl<br>( <i>Numida meleagris</i> )                          |                                                               |                                                                                                 | Fowl adenoviruses (Li et al. 2019), H7N9 virus (Fan et al. 2019)                                                                                              |
| <b>Reptiles</b>                                                     |                                                               |                                                                                                 |                                                                                                                                                               |
| Beauty rat snake<br>( <i>Orthriophis taeniurus</i> )                | <i>Spirometra</i> spp. (Xiao et al. 2019b)                    |                                                                                                 |                                                                                                                                                               |
| Red large-toothed Snake<br>( <i>Dinodon rufozonatum</i> )           |                                                               |                                                                                                 | <i>Ophidiomyces ophiodiicola</i> (Sun et al. 2021)                                                                                                            |
| Many-banded krait<br>( <i>Bungarus multicinctus</i> )               | <i>Spirometra</i> spp. (Xiao et al. 2019b)                    |                                                                                                 |                                                                                                                                                               |
| Ringed water snake<br>( <i>Sinonatrix annularis</i> )               | <i>Spirometra</i> spp. (Xiao et al. 2019b)                    |                                                                                                 |                                                                                                                                                               |
| Short-tailed pit viper                                              | <i>Spirometra</i> spp., <i>Hepatozoon</i> spp.                |                                                                                                 |                                                                                                                                                               |

|                                                            |                                                     |                                                          |                                                                                |
|------------------------------------------------------------|-----------------------------------------------------|----------------------------------------------------------|--------------------------------------------------------------------------------|
| ( <i>Gloydius brevicaudus</i> )                            | and <i>Cryptosporidium</i> spp. (Xiao et al. 2019b) |                                                          |                                                                                |
| Chinese cobra<br>( <i>Naja atra</i> )                      |                                                     | <i>Spirometra erinaceieuropaei</i><br>(Wang et al. 2011) | <i>Cryptosporidium</i> spp. (Xiao et al. 2019b)                                |
| Monocled cobra<br>( <i>Naja kaouthia</i> )                 |                                                     |                                                          | <i>Cryptosporidium</i> spp. (Xiao et al. 2019b)                                |
| Oriental rat snake<br>( <i>Ptyas mucosa</i> )              |                                                     | <i>Spirometra erinaceieuropaei</i><br>(Wang et al. 2011) | <i>Cryptosporidium</i> spp. (Xiao et al. 2019b)                                |
| Sharp-nosed pit viper<br>( <i>Deinagkistrodon acutus</i> ) |                                                     |                                                          | <i>Spirometra</i> spp. and<br><i>Cryptosporidium</i> spp. (Xiao et al. 2019b)  |
| Siamese crocodile<br>( <i>Crocodylus siamensis</i> )       |                                                     |                                                          | <i>Aeromonas</i> spp. (Pu et al. 2019),<br>tilapia parvovirus (Du et al. 2019) |
| Big-eyed rat snake<br>( <i>Ptyas dhumnades</i> )           | <i>Cryptosporidium</i> spp. (Xiao et al. 2019b)     |                                                          |                                                                                |
| King rat snake<br>( <i>Elaphe carinata</i> )               |                                                     |                                                          | <i>Cryptosporidium</i> spp. (Xiao et al. 2019b)                                |

## References:

- Bai, M. J., Zou, Y., Elsheikha, H. M., Ma, J. G., Zheng, W. B., Zhao, Q., ... & Zhu, X. Q. (2017). *Toxoplasma gondii* infection in farmed wild boars (*Sus scrofa*) in three cities of Northeast China. *Foodborne pathogens and disease*, 14(7), 379-385.
- Cao, C., Liang, L., Wang, W., Luo, H., Huang, S., Liu, D., ... & Fisher, M. C. (2011). Common reservoirs for *Penicillium marneffe* infection in humans and rodents, China. *Emerging infectious diseases*, 17(2), 209.
- Chai, Y., Deng, L., Liu, H., Yao, J., Zhong, Z., Xiang, L., ... & Hu, Y. (2019). First detection of *Cryptosporidium* spp. in red-bellied tree squirrels (*Callosciurus erythraeus*) in China. *Parasite*, 26.
- Chen, R., Lin, X., Hu, L., Chen, X., Tang, Y., Zhang, J., ... & Huang, C. (2015). Genetic characterization of *Toxoplasma gondii* from zoo wildlife and pet birds in Fujian, China. *Iranian journal of parasitology*, 10(4), 663.

- Cheng, Y., Wang, J., Zhang, M., Zhao, J., Shao, X., Ma, Z., ... & Wu, H. (2015). Isolation and sequence analysis of a canine distemper virus from a raccoon dog in Jilin Province, China. *Virus genes*, *51*(2), 298-301.
- Cui, Z., Wang, D., Wang, W., Zhang, Y., Jing, B., Xu, C., ... & Zhang, L. (2021). Occurrence and Multi-Locus Analysis of *Giardia duodenalis* in Coypus (*Myocastor coypus*) in China. *Pathogens*, *10*(2), 179.
- Deng, L., Chai, Y., Luo, R., Yang, L., Yao, J., Zhong, Z., ... & Zhou, Z. (2020). Occurrence and genetic characteristics of *Cryptosporidium* spp. and *Enterocytozoon bieneusi* in pet red squirrels (*Sciurus vulgaris*) in China. *Scientific Reports*, *10*(1), 1-10.
- Deng, L., Li, W., Yu, X., Gong, C., Liu, X., Zhong, Z., ... & Chen, H. (2016). First report of the human-pathogenic *Enterocytozoon bieneusi* from red-bellied tree squirrels (*Callosciurus erythraeus*) in Sichuan, China. *PLoS One*, *11*(9).
- Deng, L., Yue, C. J., Chai, Y. J., Wang, W. Y., Su, X. Y., Zhou, Z. Y., ... & Cao, S. Z. (2019). New genotypes and molecular characterization of *Enterocytozoon bieneusi* in pet birds in Southwestern China. *International Journal for Parasitology: Parasites and Wildlife*, *10*, 164-169.
- Du, J., Wang, W., Chan, J. F. W., Wang, G., Huang, Y., Yi, Y., ... & Yin, F. (2019). Identification of a novel ichthyic parvovirus in marine species in Hainan island, China. *Frontiers in microbiology*, *10*, 2815.
- Du, Y., Luo, J., Wang, C., Wen, Q., Duan, M., Zhang, H., & He, H. (2014). Detection of drug-resistant *Klebsiella pneumoniae* in Chinese hares (*Lepus sinensis*). *Journal of Wildlife Diseases*, *50*(1), 109-112.
- Duan, X., Zhang, P., Ma, J., Chen, S., Hao, H., Liu, H., ... & Yang, Z. (2014). Characterization of genotype IX Newcastle disease virus strains isolated from wild birds in the northern Qinling Mountains, China. *Virus genes*, *48*(1), 48-55.
- Feng, S. Y., Chang, H., Luo, J., Huang, J. J., & He, H. X. (2019). First report of *Enterocytozoon bieneusi* and *Cryptosporidium* spp. in peafowl (*Pavo cristatus*) in China. *International Journal for Parasitology: Parasites and Wildlife*, *9*, 1-6.

- Feng, S., Jia, T., Huang, J., Fan, Y., Chang, H., Han, S., ... & He, H. (2020). Identification of *Enterocytozoon bieneusi* and *Cryptosporidium* spp. in farmed wild boars (*Sus scrofa*) in Beijing, China. *Infection, Genetics and Evolution*, 80, 104231.
- Gong, X. Q., Xiao, X., Liu, J. W., Han, H. J., Qin, X. R., Lei, S. C., & Yu, X. J. (2020). Occurrence and Genotyping of *Coxiella burnetii* in Hedgehogs in China. *Vector-Borne and Zoonotic Diseases*, 20(8), 580-585.
- Han, Z., Liwen, X., Ren, M., Sheng, J., Ma, T., Sun, J., ... & Liu, S. (2020). Genetic, antigenic and pathogenic characterization of avian coronaviruses isolated from pheasants (*Phasianus colchicus*) in China. *Veterinary Microbiology*, 240, 108513.
- Hou, G. Y., Zhao, J. M., Zhou, H. L., & Rong, G. (2016). Seroprevalence and genetic characterization of *Toxoplasma gondii* in masked palm civet (*Paguma larvata*) in Hainan province, tropical China. *Acta tropica*, 162, 103-106.
- Li, F., Zhang, Z., Hu, S., Zhao, W., Zhao, J., Kvač, M., ... & Xiao, L. (2020). Common occurrence of divergent *Cryptosporidium* species and *Cryptosporidium parvum* subtypes in farmed bamboo rats (*Rhizomys sinensis*). *Parasites & vectors*, 13, 1-8.
- Li, M., Feng, S., Lv, S., Luo, J., Guo, J., Sun, J., & He, H. (2019). Highly pathogenic H5N6 avian influenza virus outbreak in *Pavo cristatus* in Jiangxi Province, China. *Emerging Microbes & Infections*, 8(1), 377-380.
- Li, M., Zhang, X., Zhu, L., Wang, H., Zhao, N., Luo, J., ... & Zhang, B. (2017). Identification, Isolation, and Phylogenetic Analysis of *Clostridium perfringens* Type A and Type C from Wild Boar (*Sus scrofa*) in the People's Republic of China. *Journal of Wildlife Diseases*, 53(3), 642-648.
- Li, Q., Li, L., Tao, W., Jiang, Y., Wan, Q., Lin, Y., & Li, W. (2016). Molecular investigation of *Cryptosporidium* in small caged pets in northeast China: host specificity and zoonotic implications. *Parasitology Research*, 115(7), 2905-2911.
- Lian, H., Liu, Y., Li, N., Wang, Y., Zhang, S., & Hu, R. (2014). Novel circovirus from mink, China. *Emerging infectious diseases*, 20(9), 1548.

- Liu, H., Li, X. T., Hu, B., Deng, X. Y., Zhang, L., Lian, S. Z., ... & Yan, X. J. (2017). Outbreak of severe pseudorabies virus infection in pig-offal-fed farmed mink in Liaoning Province, China. *Archives of virology*, 162(3), 863-866.
- Ma, X. J., Gong, X. Q., Xiao, X., Liu, J. W., Han, H. J., Qin, X. R., ... & Yu, X. J. (2020a). Detection of *Leptospira interrogans* in hedgehogs from Central China. *Vector-Borne and Zoonotic Diseases*, 20(6), 427-431.
- Ma, X., Wang, Y., Zhang, H. J., Wu, H. X., & Zhao, G. H. (2018). First report of *Giardia duodenalis* infection in bamboo rats. *Parasites & Vectors*, 11(1), 520.
- Ma, Y. Y., Zou, Y., Ma, Y. T., Nie, L. B., Xie, S. C., Cong, W., ... & Zhu, X. Q. (2020b). Molecular detection and genotype distribution of *Enterocytozoon bieneusi* in farmed silver foxes (*Vulpes vulpes*) and arctic foxes (*Vulpes lagopus*) in Shandong Province, eastern China. *Parasitology Research*, 119(1), 321-326.
- Pu, W., Guo, G., Yang, N., Li, Q., Yin, F., Wang, P., ... & Zeng, J. (2019). Three species of *Aeromonas* (*A. dhakensis*, *A. hydrophila* and *A. jandaei*) isolated from freshwater crocodiles (*Crocodylus siamensis*) with pneumonia and septicemia. *Letters in Applied Microbiology*, 68(3), 212-218.
- Qi, X., Li, X., Rider, P., Fan, W., Gu, H., Xu, L., Yang, Y., Lu, S., Wang, H., & Liu, F. (2009). Molecular characterization of highly pathogenic H5N1 avian influenza A viruses isolated from raccoon dogs in China. *PLoS one*, 4(3), e4682.  
<https://doi.org/10.1371/journal.pone.0004682>
- Sang, C., Yang, Y., Dong, Q., Xu, B., Liu, G., Hornok, S., ... & Hazihan, W. (2021). Molecular survey of *Babesia* spp. in red foxes (*Vulpes vulpes*), Asian badgers (*Meles leucurus*) and their ticks in China. *Ticks and Tick-borne Diseases*, 101710.
- Shao, X. Q., Wen, Y. J., Ba, H. X., Zhang, X. T., Yue, Z. G., Wang, K. J., ... & Yang, F. H. (2014). Novel amdoparvovirus infecting farmed raccoon dogs and arctic foxes. *Emerging Infectious Diseases*, 20(12), 2085.



- Shao, X. Q., Yan, X. J., Luo, G. L., Zhang, H. L., Chai, X. L., Wang, F. X., ... & Zhang, Y. Z. (2011). Genetic evidence for domestic raccoon dog rabies caused by Arctic-like rabies virus in Inner Mongolia, China. *Epidemiology & Infection*, *139*(4), 629-635.
- Sun, P. L., Yang, C. K., Li, W. T., Lai, W. Y., Fan, Y. C., Huang, H. C., & Yu, P. H. (2021). Infection with *Nannizziopsis guarroi* and *Ophidiomyces ophiodiicola* in reptiles in Taiwan. *Transboundary and Emerging Diseases*.
- Wang, F., Zhou, L., Gong, S., Deng, Y., Zou, J., Wu, J., ... & Hou, F. (2011). Severe infection of wild-caught snakes with *Spirometra erinaceieuropaei* from food markets in Guangzhou, China involves a risk for zoonotic sparganosis. *Journal of Parasitology*, *97*(1), 170-171.
- Wang, H., Liu, Q., Jiang, X., Zhang, Y., Zhao, A., Cui, Z., ... & Zhang, L. (2019). Dominance of zoonotic genotype D of *Enterocytozoon bieneusi* in bamboo rats (*Rhizomys sinensis*). *Infection, Genetics and Evolution*, *73*, 113-118.
- Wei, Z., Liu, Q., Zhao, W., Jiang, X., Zhang, Y., Zhao, A., ... & Qi, M. (2019). Prevalence and diversity of *Cryptosporidium* spp. in bamboo rats (*Rhizomys sinensis*) in South Central China. *International Journal for Parasitology: Parasites and Wildlife*, *9*, 312-316.
- Xiang, B., Han, L., Gao, P., You, R., Wang, F., Xiao, J., ... & Ren, T. (2017). Spillover of Newcastle disease viruses from poultry to wild birds in Guangdong province, southern China. *Infection, Genetics and Evolution*, *55*, 199-204.
- Xiao, X., Qi, R., Han, H. J., Liu, J. W., Qin, X. R., Fang, L. Z., ... & Yu, X. J. (2019b). Molecular identification and phylogenetic analysis of *Cryptosporidium*, *Hepatozoon* and *Spirometra* in snakes from central China. *International Journal for Parasitology: Parasites and Wildlife*, *10*, 274-280.
- Xiao, X., Zhou, S. H., Jiang, N., Tian, D. Z., Zhou, Z. M., Zhang, M., ... & Gao, Q. H. (2019a). First record of *Leptospira* and *Blastocystis* infections in captive flying squirrels (*Trogopterus xanthipes*) from Enshi County, China. *Acta Tropica*, *197*, 105065.

- Xu, C., Ma, X., Zhang, H., Zhang, X. X., Zhao, J. P., Ba, H. X., ... & Zhao, Q. (2016). Prevalence, risk factors and molecular characterization of *Enterocytozoon bieneusi* in raccoon dogs (*Nyctereutes procyonoides*) in five provinces of Northern China. *Acta tropica*, *161*, 68-72.
- Xu, J., Wang, X., Jing, H., Cao, S., Zhang, X., Jiang, Y., ... & Shen, Y. (2020). Identification and genotyping of *Enterocytozoon bieneusi* in wild Himalayan marmots (*Marmota himalayana*) and Alashan ground squirrels (*Spermophilus alashanicus*) in the Qinghai-Tibetan Plateau area (QTPA) of Gansu Province, China. *Parasites & vectors*, *13*(1), 1-8.
- Xu, X., Cui, Y., Xin, Y., Yang, X., Zhang, Q., Jin, Y., ... & Jin, J. (2018). Genetic diversity and spatial-temporal distribution of *Yersinia pestis* in Qinghai Plateau, China. *PLoS Neglected Tropical Diseases*, *12*(6), e0006579.
- Yang, Y., Lin, Y., Li, Q., Zhang, S., Tao, W., Wan, Q., ... & Li, W. (2015). Widespread presence of human-pathogenic *Enterocytozoon bieneusi* genotype D in farmed foxes (*Vulpes vulpes*) and raccoon dogs (*Nyctereutes procyonoides*) in China: first identification and zoonotic concern. *Parasitology Research*, *114*(11), 4341-4348.
- Yu, F., Cao, Y., Wang, H., Liu, Q., Zhao, A., Qi, M., & Zhang, L. (2020). Host-adaptation of the rare *Enterocytozoon bieneusi* genotype CHN4 in *Myocastor coypus* (Rodentia: Echimyidae) in China. *Parasites & Vectors*, *13*(1), 1-8.
- Yu, Z., Wen, X., Huang, X., Yang, R., Guo, Y., Feng, Y., ... & Li, N. (2020). Molecular characterization and zoonotic potential of *Enterocytozoon bieneusi*, *Giardia duodenalis* and *Cryptosporidium* sp. in farmed masked palm civets (*Paguma larvata*) in southern China. *Parasites & Vectors*, *13*(1), 1-10.
- Zhang, X. X., Jiang, R. L., Ma, J. G., Xu, C., Zhao, Q., Hou, G., & Liu, G. H. (2018). *Enterocytozoon bieneusi* in minks (*Neovison vison*) in Northern China: a public health concern. *Frontiers in Microbiology*, *9*, 1221.

Zhao, J. J., Yan, X. J., Chai, X. L., Martella, V., Luo, G. L., Zhang, H. L., ... & Cheng, S. P. (2010). Phylogenetic analysis of the haemagglutinin gene of canine distemper virus strains detected from breeding foxes, raccoon dogs and minks in China. *Veterinary microbiology*, *140*(1-2), 34-42.

Zhao, P., Sun, L., Sun, X., Li, S., Zhang, W., Pulscher, L. A., ... & Xing, M. (2017). Newcastle disease virus from domestic mink, China, 2014. *Veterinary microbiology*, *198*, 104-107.

Zheng, W. B., Cong, W., Hou, J., Ma, J. G., Zhang, X. X., Zhu, X. Q., ... & Zhou, D. H. (2017). Seroprevalence and risk factors of *Toxoplasma gondii* infection in farmed raccoon dogs (*Nyctereutes procyonoides*) in China. *Vector-Borne and Zoonotic Diseases*, *17*(3), 209-212.

Zhu, Y. C., Zhang, B., Sun, Z. H., Wang, X. J., Fan, X. H., Gao, L. X., ... & Zhang, Z. F. (2018). Replication and pathology of duck influenza virus subtype H9N2 in Chukar. *Biomedical and environmental sciences*, *31*(4), 306-310.
